# Supplementary material for: Preparation of SBA-15-Supported Metals by Vapor-Phase Infiltration
Source: MDPI journal article supplement (doi:10.3390/inorganics10110215), 2022-11-19
Supplement: s1 [file s1]

Archive with 1 entries (1 files):
- inorganics-2043179-supplementary.pdf
