# Supplementary material for: Preparation of SBA-15-Supported Metals by Vapor-Phase Infiltration
Source: MDPI journal article supplement (doi:10.3390/inorganics10110215), 2022-11-19
Supplement: s1 [file s1 › inorganics-2043179-supplementary.pdf]

# Supporting Information

## Preparation of SBA-15 Supported Metals by Vapor-Phase Infiltration

*Ching-Yu Wang, Kai Shen, Raymond J. Gorte, and John M. Vohs\**

Department of Chemical and Biomolecular Engineering, University of Pennsylvania, Philadelphia,  
Pennsylvania 19104, United States

E-mail: [vohs@seas.upenn.edu](mailto:vohs@seas.upenn.edu)

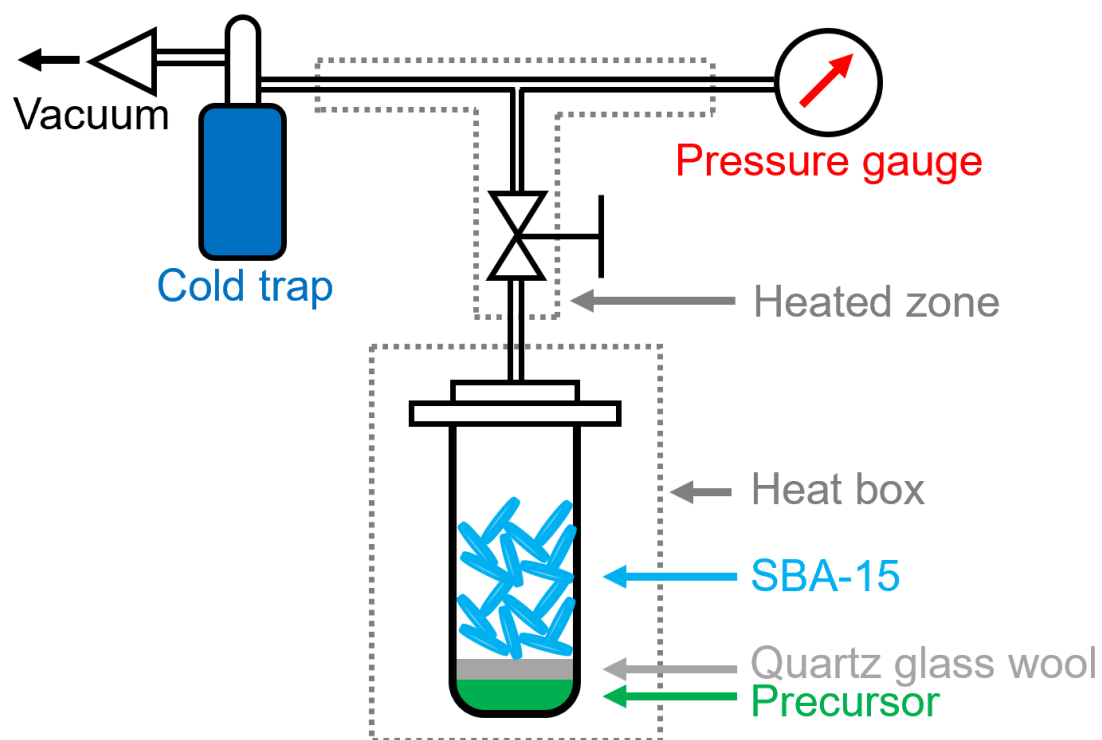

**Figure S1.** Schematic diagram of the home-built vapor-phase infiltration equipment.
